# Supplementary material
Source: PubMed Central journal article supplement (PMC5702911)
Supplement: NIHMS919214-supplement-Supplemental.pdf [file NIHMS919214-supplement-Supplemental.pdf]

**Table E1. Results of the 2AFC Detection Experiment Showing the Number of Detected Lesions for Each Reader, Reconstruction Algorithm, and Radiation Dose Level**

| Reader and Reconstruction Algorithm | Radiation Dose |             |             |             |             |             | All          |
|-------------------------------------|----------------|-------------|-------------|-------------|-------------|-------------|--------------|
|                                     | 12.5%          | 25%         | 37.5%       | 50%         | 75%         | 100%        |              |
| 1                                   |                |             |             |             |             |             |              |
| FBP                                 | 62/105 (59)    | 65/105 (62) | 71/105 (68) | 76/105 (72) | 69/105 (66) | 72/105 (69) | 415/630 (66) |
| SAFIRE5                             | 64/105 (61)    | 62/105 (59) | 62/105 (59) | 72/105 (69) | 64/105 (61) | 75/105 (71) | 399/630 (63) |
| 2                                   |                |             |             |             |             |             |              |
| FBP                                 | 62/105 (59)    | 66/105 (63) | 63/105 (60) | 70/105 (67) | 62/105 (59) | 75/105 (71) | 398/630 (63) |
| SAFIRE5                             | 62/105 (59)    | 67/105 (64) | 67/105 (64) | 68/105 (65) | 77/105 (73) | 80/105 (76) | 421/630 (67) |
| 3                                   |                |             |             |             |             |             |              |
| FBP                                 | 64/105 (61)    | 73/105 (70) | 76/105 (72) | 80/105 (76) | 74/105 (70) | 80/105 (76) | 447/630 (71) |
| SAFIRE5                             | 70/105 (67)    | 71/105 (68) | 73/105 (70) | 78/105 (74) | 81/105 (77) | 79/105 (75) | 452/630 (72) |
| 4                                   |                |             |             |             |             |             |              |
| FBP                                 | 75/105 (71)    | 81/105 (77) | 88/105 (84) | 88/105 (84) | 96/105 (91) | 98/105 (93) | 526/630 (83) |
| SAFIRE5                             | 75/105 (71)    | 90/105 (86) | 91/105 (87) | 91/105 (87) | 98/105 (93) | 99/105 (94) | 544/630 (86) |
| 5                                   |                |             |             |             |             |             |              |
| FBP                                 | 61/105 (58)    | 78/105 (74) | 75/105 (71) | 78/105 (74) | 90/105 (86) | 85/105 (81) | 467/630 (74) |
| SAFIRE5                             | 61/105 (58)    | 65/105 (62) | 76/105 (72) | 68/105 (65) | 81/105 (77) | 81/105 (77) | 432/630 (69) |
| 6                                   |                |             |             |             |             |             |              |
| FBP                                 | 74/105 (70)    | 79/105 (75) | 83/105 (79) | 83/105 (79) | 94/105 (90) | 87/105 (83) | 500/630 (79) |
| SAFIRE5                             | 75/105 (71)    | 86/105 (82) | 86/105 (82) | 89/105 (85) | 94/105 (90) | 91/105 (87) | 521/630 (83) |
| 7                                   |                |             |             |             |             |             |              |
| FBP                                 | 65/105 (62)    | 84/105 (80) | 85/105 (81) | 85/105 (81) | 86/105 (82) | 80/105 (76) | 485/630 (77) |
| SAFIRE5                             | 70/105 (67)    | 74/105 (70) | 77/105 (73) | 82/105 (78) | 88/105 (84) | 90/105 (86) | 481/630 (76) |
| 8                                   |                |             |             |             |             |             |              |
| FBP                                 | 64/105 (61)    | 77/105 (73) | 84/105 (80) | 82/105 (78) | 93/105 (89) | 92/105 (88) | 492/630 (78) |
| SAFIRE5                             | 72/105 (69)    | 82/105 (78) | 81/105 (77) | 83/105 (79) | 91/105 (87) | 99/105 (94) | 508/630 (81) |
| 9                                   |                |             |             |             |             |             |              |
| FBP                                 | 59/105 (56)    | 65/105 (62) | 67/105 (64) | 66/105 (63) | 66/105 (63) | 64/105 (61) | 387/630 (61) |

|         |                |                |                |                |                |                |                 |
|---------|----------------|----------------|----------------|----------------|----------------|----------------|-----------------|
| SAFIRE5 | 66/105 (63)    | 68/105 (65)    | 73/105 (70)    | 73/105 (70)    | 79/105 (75)    | 68/105 (65)    | 427/630 (68)    |
| 10      |                |                |                |                |                |                |                 |
| FBP     | 74/105 (70)    | 64/105 (61)    | 72/105 (69)    | 71/105 (68)    | 76/105 (72)    | 69/105 (66)    | 426/630 (68)    |
| SAFIRE5 | 56/105 (53)    | 64/105 (61)    | 65/105 (62)    | 72/105 (69)    | 68/105 (65)    | 75/105 (71)    | 400/630 (63)    |
| 11      |                |                |                |                |                |                |                 |
| FBP     | 69/105 (66)    | 72/105 (69)    | 78/105 (74)    | 87/105 (83)    | 84/105 (80)    | 84/105 (80)    | 474/630 (75)    |
| SAFIRE5 | 72/105 (69)    | 83/105 (79)    | 86/105 (82)    | 79/105 (75)    | 92/105 (88)    | 91/105 (87)    | 503/630 (80)    |
| 12      |                |                |                |                |                |                |                 |
| FBP     | 70/105 (67)    | 86/105 (82)    | 81/105 (77)    | 79/105 (75)    | 90/105 (86)    | 90/105 (86)    | 496/630 (79)    |
| SAFIRE5 | 71/105 (68)    | 84/105 (80)    | 92/105 (88)    | 93/105 (89)    | 95/105 (90)    | 93/105 (89)    | 528/630 (84)    |
| 13      |                |                |                |                |                |                |                 |
| FBP     | 66/105 (63)    | 77/105 (73)    | 79/105 (75)    | 92/105 (88)    | 92/105 (88)    | 93/105 (89)    | 499/630 (79)    |
| SAFIRE5 | 81/105 (77)    | 70/105 (67)    | 82/105 (78)    | 80/105 (76)    | 88/105 (84)    | 94/105 (90)    | 495/630 (79)    |
| 14      |                |                |                |                |                |                |                 |
| FBP     | 69/105 (66)    | 68/105 (65)    | 66/105 (63)    | 77/105 (73)    | 77/105 (73)    | 80/105 (76)    | 437/630 (69)    |
| SAFIRE5 | 77/105 (73)    | 79/105 (75)    | 81/105 (77)    | 69/105 (66)    | 78/105 (74)    | 86/105 (82)    | 470/630 (75)    |
| 15      |                |                |                |                |                |                |                 |
| FBP     | 78/105 (74)    | 75/105 (71)    | 86/105 (82)    | 79/105 (75)    | 88/105 (84)    | 93/105 (89)    | 499/630 (79)    |
| SAFIRE5 | 76/105 (72)    | 80/105 (76)    | 82/105 (78)    | 85/105 (81)    | 84/105 (80)    | 94/105 (90)    | 501/630 (80)    |
| 16      |                |                |                |                |                |                |                 |
| FBP     | 72/105 (69)    | 67/105 (64)    | 65/105 (62)    | 84/105 (80)    | 76/105 (72)    | 79/105 (75)    | 443/630 (70)    |
| SAFIRE5 | 64/105 (61)    | 66/105 (63)    | 65/105 (62)    | 69/105 (66)    | 85/105 (81)    | 84/105 (80)    | 433/630 (69)    |
| All     |                |                |                |                |                |                |                 |
| FBP     | 1084/1680 (65) | 1177/1680 (70) | 1219/1680 (73) | 1277/1680 (76) | 1313/1680 (78) | 1321/1680 (79) | 7391/10080 (73) |
| SAFIRE5 | 1112/1680 (66) | 1191/1680 (71) | 1239/1680 (74) | 1251/1680 (74) | 1343/1680 (80) | 1379/1680 (82) | 7515/10080 (75) |

Note.—Data are raw data, with percentages in parentheses.
